# Supplementary material for: Forecasting COVID-19-Associated Hospitalizations under Different Levels of Social Distancing in Lombardy and Emilia-Romagna, Northern Italy: Results from an Extended SEIR Compartmental Model
Source: PubMed Central journal article supplement (PMC7290384; doi:10.3390/jcm9051492), 2020-05-15
Supplement: jcm-09-01492-s001.pdf [file jcm-09-01492-s001.pdf]

## Supplementary Materials

**Article title:** Forecasting COVID-19-Associated Hospitalizations under Different Levels of Social Distancing in Lombardy and Emilia-Romagna, Northern Italy: Results from an Extended SEIR Compartmental Model

**Journal name:** Journal of Clinical Medicine

**Author names:** Chiara Reno, Jacopo Lenzi, Antonio Navarra, Eleonora Barelli, Davide Gori, Alessandro Lanza, Riccardo Valentini, Biao Tang and Maria Pia Fantini

**Affiliation and e-mail of the corresponding author:** Alma Mater Studiorum—University of Bologna, [jacopo.lenzi2@unibo.it](mailto:jacopo.lenzi2@unibo.it)

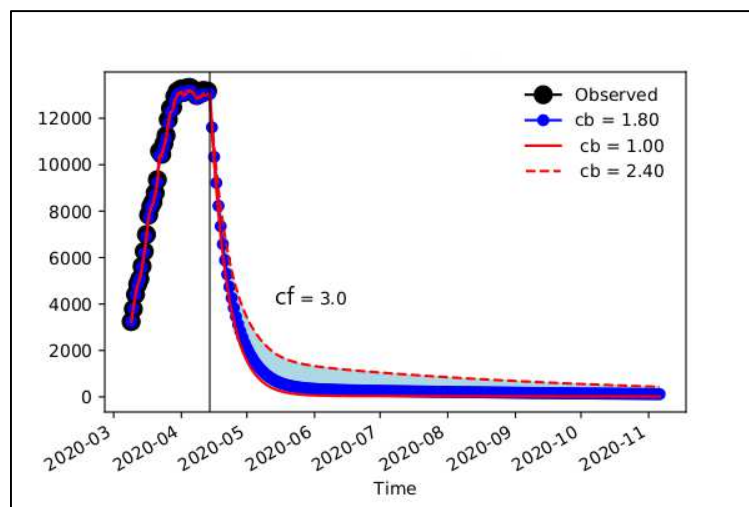

**Figure S1.** Lombardy's COVID-19-associated hospitalizations, assuming that on day 0 (9 March 2020) there were 5 times as many undetected infected individuals ( $A + I$ ) as known infected individuals ( $H + L + D$ ).

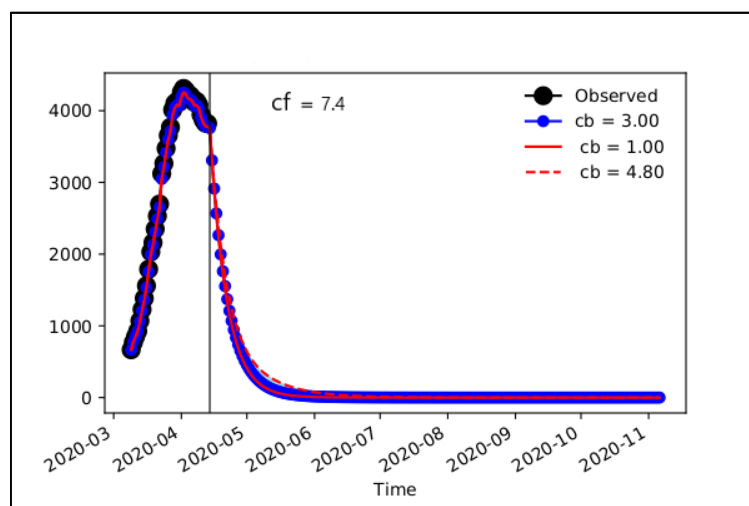

**Figure S2.** Emilia-Romagna's COVID-19-associated hospitalizations, assuming that on day 0 (9 March 2020) there were 5 times as many undetected infected individuals ( $A + I$ ) as known infected individuals ( $H + L + D$ ).

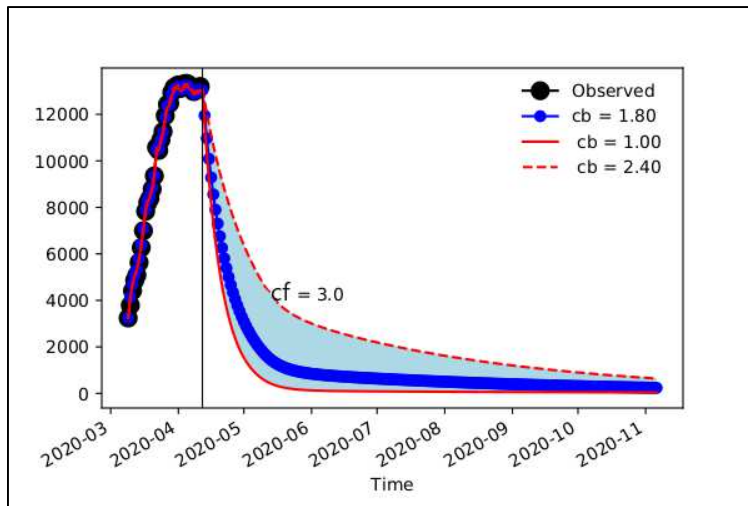

**Figure S3.** Lombardy's COVID-19-associated hospitalizations, assuming that on day 0 (9 March 2020) asymptomatic cases ( $A$ ) were one-third of the infected pool ( $A + I$ ).

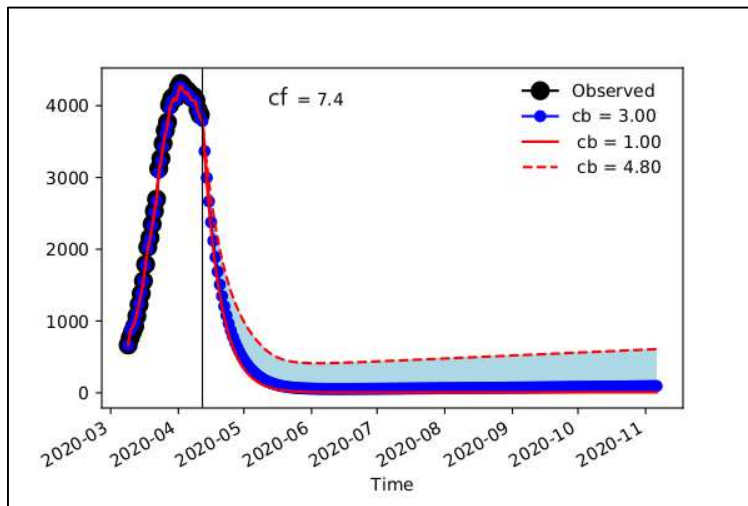

**Figure S4.** Emilia-Romagna's COVID-19-associated hospitalizations, assuming that on day 0 (9 March 2020) asymptomatic cases ( $A$ ) were one-third of the infected pool ( $A + I$ ).

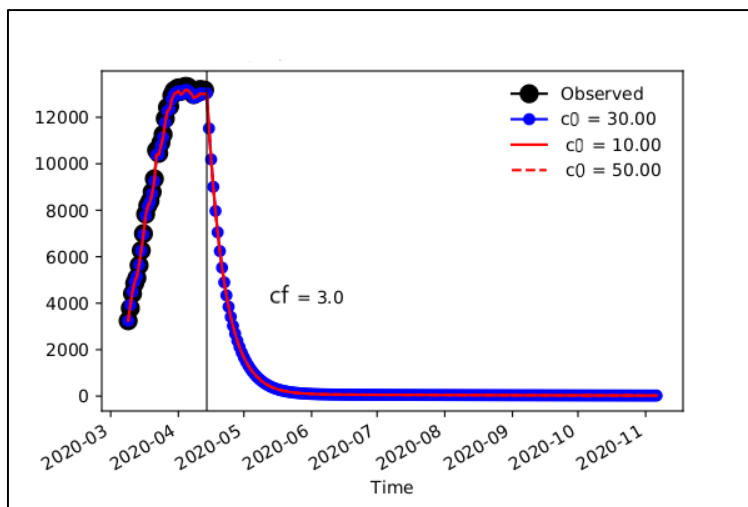

**Figure S5.** Lombardy's COVID-19-associated hospitalizations under different values of the contact rate on day 0 (9 March 2020).

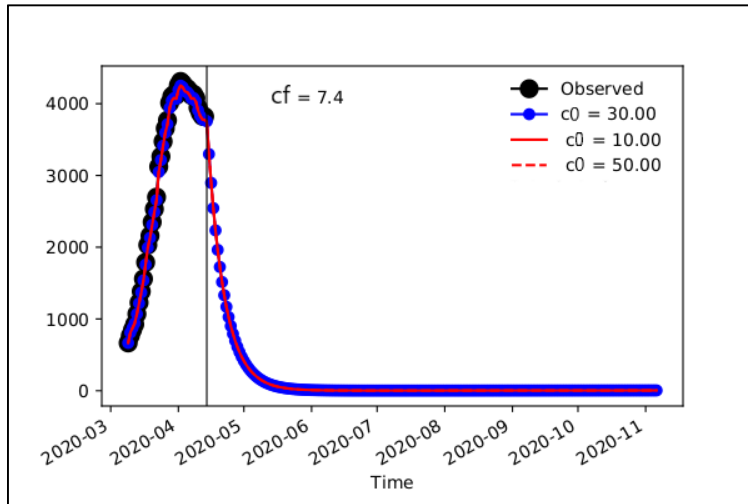

**Figure S6.** Emilia-Romagna's COVID-19-associated hospitalizations under different values of the contact rate on day 0 (9 March 2020).
